# Supplementary material for: An assessment of CO2 and CH4 emissions in a tropical river: from the Kenyir Reservoir to the estuary
Source: PeerJ. 2025 Sep 3;13:e19929. doi: 10.7717/peerj.19929 (PMC12422260; doi:10.7717/peerj.19929)
Supplement: Supplemental Information 1 [file peerj-13-19929-s001.xlsx]

## Sheet: raw data 
												degC	m	PSU	%	mg/L	mg/l	uM	uM	uATM	uATM
No.	SITE	DATE	Time	LAT	LONG	Landuse	Study area	ZONE	SEASON	LAYER	LABEL	TEMPERATURE	DEPTH	Salinity	DO	DO	DOC	CO2	CH4	pCO2	pCH4	F(CO2) mM m-2 d-1	F(CH4) mM m-2 d-1			limnetic.dry.epi.CH4	limnetic.dry.epi.CO2	limnetic.wet.epi.CH4	limnetic.wet.epi.CO2
1	s1	2018-02-01		5.12107	102.79		Reservoir	littoral	wet	epi	littoral.wet.epi	28.08	0.5		100.3	7.84	2.275	164.832	0.256	6.39949	4450.17	101.784	0.108249		Min. :	0.112709	156.327	0.17589	23.6215
2	s1	2018-02-01		5.12107	102.79		Reservoir	littoral	wet	epi	littoral.wet.epi	27.83	4.5		98	7.69	1.765	182.488	0.386885						1st Qu.:	0.358483	187.921	0.3585	148.392
3	s1	2018-02-01		5.12107	102.79		Reservoir	littoral	wet	meta	littoral.wet.meta	25.8	17.9		62.5	5.09	1.5425	137.204	0.166219						Median :	0.882277	207.202	0.807841	161.181
4	s1	2018-02-01		5.12107	102.79		Reservoir	littoral	wet	hypo	littoral.wet.hypo	25.63	19.3		65.7	5.37	1.32	268.592	0.125736						3rd Qu.:	1.95011	228.104	1.76644	173.799
5	s1	2018-02-01		5.12107	102.79		Reservoir	littoral	wet	hypo	littoral.wet.hypo	24.21	36.1		65.7	5.99	1.35	235.385	0.161056						Max. :	127.263	616.202	7.06692	246.826
6	s2	2018-02-01		5.09415	102.817		Reservoir	littoral	wet	epi	littoral.wet.epi	28.11	0.5		100.5	7.85	1.355	163.968	0.31261	7.81853	4432.46	101.335	0.143206		Mean :	8.70337	236.551	1.34866	161.841
7	s2	2018-02-01		5.09415	102.817		Reservoir	littoral	wet	epi	littoral.wet.epi	27.95	3.906		98.5	7.71	1.51	173.964	0.291607						Stdev :	23.6853	97.1918	1.59188	42.8442
8	s2	2018-02-01		5.09415	102.817		Reservoir	littoral	wet	epi	littoral.wet.epi	26.55	11.623		68.7	5.52	1.72	352.95	0.136934						NA's :	33	33	20	20
9	s2	2018-02-01		5.09415	102.817		Reservoir	littoral	wet	hypo	littoral.wet.hypo	25.71	19.772		25.3	2.06	2.01	385.625	0.144335							limnetic.dry.hypo.CH4	limnetic.dry.hypo.CO2	limnetic.wet.hypo.CH4	limnetic.wet.hypo.CO2
10	s3	2018-02-01		5.05075	102.825		Reservoir	limnetic	wet	epi	limnetic.wet.epi	28.03	0.5		99.2	7.76	1.415	226.986	0.256504	6.40674	6115.26	143.79	0.108376		Min. :	0.61929	176.266	2.21107	237.238
11	s3	2018-02-01		5.05075	102.825		Reservoir	limnetic	wet	epi	limnetic.wet.epi	27.88	4.894		99.2	8.03	1.465	158.972	0.262343						1st Qu.:	233.037	484.5	411.667	535.595
12	s3	2018-02-01		5.05075	102.825		Reservoir	limnetic	wet	meta	limnetic.wet.meta	26.2	16.642		47.8	3.86	1.485	326.635	0.0931817						Median :	395.214	610.268	560.45	607.062
13	s3	2018-02-01		5.05075	102.825		Reservoir	limnetic	wet	hypo	limnetic.wet.hypo	23.78	47.58		7.4	0.62	1.485	632.411	560.45						3rd Qu.:	515.47	678.139	663.158	698.681
14	s4	2018-02-01		4.99966	102.796		Reservoir	limnetic	wet	epi	limnetic.wet.epi	28.34	3.381		97.6	7.59	1.905	173.416	0.241915						Max. :	678.716	926.239	983.436	875.353
15	s4	2018-02-01		4.99966	102.796		Reservoir	limnetic	wet	epi	limnetic.wet.epi	28.37	0.5		99.5	7.74	1.77	171.217	0.342121	12.7398	4451.77	101.812	0.265004		Mean :	355.033	596.563	523.819	592.309
16	s4	2018-02-01		4.99966	102.796		Reservoir	limnetic	wet	meta	limnetic.wet.meta	26.55	11.565		59.2	4.76	2.185	292.056	0.202079						Stdev :	201.443	163.65	254.568	158.71
17	s4	2018-02-01		4.99966	102.796		Reservoir	limnetic	wet	meta	limnetic.wet.meta	25.71	20.18		28.8	2.35	3.56	309.621	1.19628						NA's :	32	32	15	15
18	s4	2018-02-01		4.99966	102.796		Reservoir	limnetic	wet	hypo	limnetic.wet.hypo	24.11	40		0	0	3.7	497.821	785.403							limnetic.dry.meta.CH4	limnetic.dry.meta.CO2	limnetic.wet.meta.CH4	limnetic.wet.meta.CO2
19	s4	2018-02-01		4.99966	102.796		Reservoir	limnetic	wet	hypo	limnetic.wet.hypo	23.98	60		0	0	5.295	400.879	383.733						Min. :	0.394585	58.1907	0.0931817	292.056
20	s4	2018-02-01		4.99966	102.796		Reservoir	limnetic	wet	hypo	limnetic.wet.hypo	23.98	77		0	0	5.66	597.23	683.346						1st Qu.:	1.52135	399.365	0.947731	322.382
21	s5	2018-02-01		5.00796	102.84		Reservoir	limnetic	wet	epi	limnetic.wet.epi	28.09	3.81		92.8	7.26	1.74	23.6215	0.411645						Median :	22.637	427.903	124.167	485.547
22	s5	2018-02-01		5.00796	102.84		Reservoir	limnetic	wet	epi	limnetic.wet.epi	26.73	11.44		70.1	5.62	1.935	246.826	0.17589						3rd Qu.:	100.746	545.12	416.25	657.259
23	s5	2018-02-01		5.00796	102.84		Reservoir	limnetic	wet	epi	limnetic.wet.epi	28.04	0.5		79.3	6.2	1.63	135.039	1.62988	10.2835	636.659	5.59135	0.203737		Max. :	352.97	663.863	597.649	719.398
24	s5	2018-02-01		5.00796	102.84		Reservoir	limnetic	wet	meta	limnetic.wet.meta	25.79	19.59		19.8	1.61	1.96	566.123	107.184						Mean :	82.8431	438.553	217.294	493.071
25	s5	2018-02-01		5.00796	102.84		Reservoir	limnetic	wet	hypo	limnetic.wet.hypo	24.22	30.77		0	3.43	2.58	237.238	2.21107						Stdev :	123.835	174.167	243.342	178.889
26	s7	2018-02-01		4.96616	102.837		Reservoir	littoral	wet	epi	littoral.wet.epi	28.96	0.5		98.9	7.61	1.46	129.891	0.588792	14.9336	3639.83	81.3556	0.321146		NA's :	12	12	8	8
27	s7	2018-02-01		4.96616	102.837		Reservoir	littoral	wet	epi	littoral.wet.epi	28.85	3.529		100.9	7.78	1.855	146.067	0.411727
28	s7	2018-02-01		4.96616	102.837		Reservoir	littoral	wet	meta	littoral.wet.meta	26.68	12.844		84.1	6.74	3.005	164.571	1.98845						Epi	CH4	CO2
29	s7	2018-02-01		4.96616	102.837		Reservoir	littoral	wet	meta	littoral.wet.meta	26.02	17.584		83.3	6.76	4.3875	169.351	2.22579						Min. :	0.112709	23.6215
30	s7	2018-02-01		4.96616	102.837		Reservoir	littoral	wet	hypo	littoral.wet.hypo	25.01	27		41.7	3.45	5.475	563.9	597.982						1st Qu.:	0.426106	158.9
31	s7	2018-02-01		4.96616	102.837		Reservoir	littoral	wet	hypo	littoral.wet.hypo	24.24	40		41.5	3.48	6	878.252	1346.68						Median :	0.777569	179.364
32	s1	2018-03-01		5.12107	102.79		Reservoir	littoral	dry	epi	littoral.dry.epi	31.02	0.5		102.7	7.33	2.735	95.5731	0.785282	20.579	2921.99	26.1561	0.19475		3rd Qu.:	1.65534	207.033
33	s1	2018-03-01		5.12107	102.79		Reservoir	littoral	dry	epi	littoral.dry.epi	30.09	4.5		103.7	7.83	2.041	188.165	0.859727						Max. :	127.263	616.202
34	s1	2018-03-01		5.12107	102.79		Reservoir	littoral	dry	metq	littoral.dry.metq	26.39	16.3		44.8	3.61	2.508	251.848	0.774688						Mean :	3.82696	191.721
35	s1	2018-03-01		5.12107	102.79		Reservoir	littoral	dry	hypo	littoral.dry.hypo	25.73	20.1		39.2	3.2	1.322	375.49	0.652345						Stdev :	14.329	74.0623
36	s1	2018-03-01		5.12107	102.79		Reservoir	littoral	dry	hypo	littoral.dry.hypo	24.31	32.3		37.3	3.12	1.904	380.277	0.613506						NA's :	97	97
37	s2	2018-03-01		5.09415	102.817		Reservoir	littoral	dry	epi	littoral.dry.epi	30.57	0.5		102.8	7.7	1.928	200.748	0.769856	20.0342	6021.82	58.3277	0.18766		meta
38	s2	2018-03-01		5.09415	102.817		Reservoir	littoral	dry	epi	littoral.dry.epi	29.8	5.707		104.8	7.95	1.881	173.029	0.641294						Min. :	0.0931817	58.1907
39	s2	2018-03-01		5.09415	102.817		Reservoir	littoral	dry	epi	littoral.dry.epi	27.68	10.451		96.5	7.6	1.527	309.903	0.624014						1st Qu.:	0.634941	261.9
40	s2	2018-03-01		5.09415	102.817		Reservoir	littoral	dry	hypo	littoral.dry.hypo	25.7	20.125		27.5	2.25	1.214	420.634	0.796628						Median :	2.65747	373.314
41	s2	2018-03-01		5.09415	102.817		Reservoir	littoral	dry	hypo	littoral.dry.hypo	25.13	26		15	4.03	1.335	367.142	0.668098						3rd Qu.:	99.7407	529.996
42	s3	2018-03-01		5.05075	102.825		Reservoir	limnetic	dry	epi	limnetic.dry.epi	29.71	6.738		105.6	8.02	1.502	219.552	1.27877						Max. :	597.649	719.398
43	s3	2018-03-01		5.05075	102.825		Reservoir	limnetic	dry	epi	limnetic.dry.epi	30.24	0.5		104.1	7.83	2.37	191.595	0.759682	19.6672	5667.58	54.5505	0.182933		Mean :	89.1391	377.714
44	s3	2018-03-01		5.05075	102.825		Reservoir	limnetic	dry	meta	limnetic.dry.meta	26.3	17.167		40.3	3.25	1.024	422.618	1.76416						Stdev :	164.964	179.894
45	s3	2018-03-01		5.05075	102.825		Reservoir	limnetic	dry	hypo	limnetic.dry.hypo	24.1	34.096		36.5	3.91	0.8213	328.424	14.3591						NA's :	31	31
46	s3	2018-03-01		5.05075	102.825		Reservoir	limnetic	dry	hypo	limnetic.dry.hypo	23.82	45.097		19.6	1.65	1.38	437.178	379.281						hypo
47	s3	2018-03-01		5.05075	102.825		Reservoir	limnetic	dry	hypo	limnetic.dry.hypo	23.66	60.397		6.2	0.53	1.196	382.795	278.77						Min. :	0.11877	176.266
48	s3	2018-03-01		5.05075	102.825		Reservoir	limnetic	dry	hypo	limnetic.dry.hypo	23.61	75.252		3.7	0.31	1.987	603.355	257.887						1st Qu.:	13.0537	392.798
49	s4	2018-03-01		4.99966	102.796		Reservoir	limnetic	dry	epi	limnetic.dry.epi	29.81	3.727		104	7.89	2.1	299.898	4.98928						Median :	379.281	572.706
50	s4	2018-03-01		4.99966	102.796		Reservoir	limnetic	dry	epi	limnetic.dry.epi	28.1	9.638		101.6	7.94	2.461	616.202	127.263						3rd Qu.:	527.364	673.179
51	s4	2018-03-01		4.99966	102.796		Reservoir	limnetic	dry	epi	limnetic.dry.epi	30.34	0.5		104.1	7.83	2.973	214.536	0.940366	20.5599	6065.63	58.7122	0.192458		Max. :	1346.68	926.239
52	s4	2018-03-01		4.99966	102.796		Reservoir	limnetic	dry	meta	limnetic.dry.meta	25.79	20.095		13.3	1.08	1.931	204.185	0.792912						Mean :	337.47	548.964
53	s4	2018-03-01		4.99966	102.796		Reservoir	limnetic	dry	hypo	limnetic.dry.hypo	24.1	33.945		4.3	0.37	3.199	484.933	421.975						Stdev :	292.835	175.078
54	s4	2018-03-01		4.99966	102.796		Reservoir	limnetic	dry	hypo	limnetic.dry.hypo	23.77	48.549		3	0.26	2.455	721.968	280.048						NA's :	63	63
55	s4	2018-03-01		4.99966	102.796		Reservoir	limnetic	dry	hypo	limnetic.dry.hypo	23.65	65.926		2.4	0.2	2.005	672.856	411.146
56	s5	2018-03-01		5.00796	102.84		Reservoir	limnetic	dry	epi	limnetic.dry.epi	29.76	4.93		104.1	7.9	2.601	436.439	32.8636
57	s5	2018-03-01		5.00796	102.84		Reservoir	limnetic	dry	epi	limnetic.dry.epi	28.78	10.78		98.1	7.57	2.17	246.452	19.2273
58	s5	2018-03-01		5.00796	102.84		Reservoir	limnetic	dry	epi	limnetic.dry.epi	30.5	0.5		102.7	7.69	2.173	187.921	0.63872	16.6034	5620.39	54.1306	0.151796
59	s5	2018-03-01		5.00796	102.84		Reservoir	limnetic	dry	meta	limnetic.dry.meta	25.83	20.49		10.2	0.83	1.812	405.588	25.8363
60	s5	2018-03-01		5.00796	102.84		Reservoir	limnetic	dry	hypo	limnetic.dry.hypo	23.9	41.26		5.9	0.5	2.637	857.633	532.339
61	s5	2018-03-01		5.00796	102.84		Reservoir	limnetic	dry	hypo	limnetic.dry.hypo	24.53	70		0	0	2.88	694.22	565.597
62	s5	2018-03-01		5.00796	102.84		Reservoir	limnetic	dry	hypo	limnetic.dry.hypo	24.4	60		0	0	1.609	747.741	657.696
63	s6	2018-03-01		5.0201	102.903		Reservoir	limnetic	dry	epi	limnetic.dry.epi	28.9	4.72		103.5	7.97	2.384	248.881	0.882277
64	s6	2018-03-01		5.0201	102.903		Reservoir	limnetic	dry	epi	limnetic.dry.epi	29.38	0.5		102.5	7.83	2.003	220.977	0.65232	16.6578	6303.23	60.9782	0.150041
65	s6	2018-03-01		5.0201	102.903		Reservoir	limnetic	dry	meta	limnetic.dry.meta	26.6	14.78		35.5	2.85	1.387	414.626	0.588359
66	s6	2018-03-01		5.0201	102.903		Reservoir	limnetic	dry	hypo	limnetic.dry.hypo	24.61	27.55		18.2	1.52	2.011	463.621	0.61929
67	s6	2018-03-01		5.0201	102.903		Reservoir	limnetic	dry	hypo	limnetic.dry.hypo	23.74	50.26		3.1	0.26	3.137	673.931	74.8114
68	s7	2018-03-01		4.96616	102.837		Reservoir	littoral	dry	epi	littoral.dry.epi	30.38	0.5		103.1	7.74	2.026	211.729	0.825154	21.4093	6300.39	61.1636	0.201387
69	s7	2018-03-01		4.96616	102.837		Reservoir	littoral	dry	epi	littoral.dry.epi	29.91	5.202		106.7	8.07	2.995	237.739	2.85039
70	s7	2018-03-01		4.96616	102.837		Reservoir	littoral	dry	meta	littoral.dry.meta	26.9	13.189		68.5	5.47	2.407	347.081	1.42557
71	s7	2018-03-01		4.96616	102.837		Reservoir	littoral	dry	hypo	littoral.dry.hypo	25.32	22.87		17	1.4	1.562	375.501	0.725502
72	s1	2018-05-01		5.12107	102.79		Reservoir	littoral	dry	epi	littoral.dry.epi	31.66	0.5		105.1	7.72	2.547	157.5	0.592253	15.6735	4947.45	47.548	0.145007
73	s1	2018-05-01		5.12107	102.79		Reservoir	littoral	dry	epi	littoral.dry.epi	30.95	2.8		107	7.95	2.826	157.329	0.341577
74	s1	2018-05-01		5.12107	102.79		Reservoir	littoral	dry	meta	littoral.dry.meta	26.87	16.8		51.2	4.09	1.866	164.284	0.293767
75	s1	2018-05-01		5.12107	102.79		Reservoir	littoral	dry	hypo	littoral.dry.hypo	25.96	20		20.1	1.63	3.086	380.279	0.11877
76	s1	2018-05-01		5.12107	102.79		Reservoir	littoral	dry	hypo	littoral.dry.hypo	24.34	31		8.3	0.69	2.105	294	2.93059
77	s2	2018-05-01		5.09415	102.817		Reservoir	littoral	dry	epi	littoral.dry.epi	31.68	0.5		103.8	7.63	3.06	174.274	0.430898	11.4068	5478.99	53.1348	0.0997979
78	s2	2018-05-01		5.09415	102.817		Reservoir	littoral	dry	epi	littoral.dry.epi	30.63	5.326		106.4	7.96	2.235	164.217	0.345278
79	s2	2018-05-01		5.09415	102.817		Reservoir	littoral	dry	epi	littoral.dry.epi	29.78	10.473		105.6	8.01	3.438	161.885	0.45759
80	s2	2018-05-01		5.09415	102.817		Reservoir	littoral	dry	hypo	littoral.dry.hypo	25.77	20.872		22	1.79	2.682	365.257	1.92412
81	s2	2018-05-01		5.09415	102.817		Reservoir	littoral	dry	hypo	littoral.dry.hypo	24.83	25.934		8.7	0.73	2.817	393.372	11.7484
82	s3	2018-05-01		5.05075	102.825		Reservoir	limnetic	dry	epi	limnetic.dry.epi	30.49	5.679		104.2	7.81	1.112	156.327	0.346751
83	s3	2018-05-01		5.05075	102.825		Reservoir	limnetic	dry	epi	limnetic.dry.epi	30.25	10.24		103.4	7.78	1.997	364.175	0.112709
84	s3	2018-05-01		5.05075	102.825		Reservoir	limnetic	dry	epi	limnetic.dry.epi	31.18	0.5		103.9	7.7	1.935	169.987	0.588649	15.4642	5232.37	50.3219	0.141526
85	s3	2018-05-01		5.05075	102.825		Reservoir	limnetic	dry	meta	limnetic.dry.meta	26.04	20.308		15.6	1.26	4.326	58.1907	0.394585
86	s3	2018-05-01		5.05075	102.825		Reservoir	limnetic	dry	hypo	limnetic.dry.hypo	24.36	29.94		26.6	2.22	0.9986	568.637	425.94
87	s3	2018-05-01		5.05075	102.825		Reservoir	limnetic	dry	hypo	limnetic.dry.hypo	23.81	44.959		10	0.85	2.526	176.266	16.1989
88	s3	2018-05-01		5.05075	102.825		Reservoir	limnetic	dry	hypo	limnetic.dry.hypo	23.7	53.6		3.7	0.31	1.398	486.627	283.324
89	s4	2018-05-01		4.99966	102.796		Reservoir	limnetic	dry	epi	limnetic.dry.epi	30.44	4.529		102.4	7.68	1.327	194.37	0.647564
90	s4	2018-05-01		4.99966	102.796		Reservoir	limnetic	dry	epi	limnetic.dry.epi	30.35	10.613		102.1	7.67	2.961	175.411	0.92165
91	s4	2018-05-01		4.99966	102.796		Reservoir	limnetic	dry	epi	limnetic.dry.epi	30.87	0.5		103.2	7.68	5.743	203.912	1.95011	16.9306	5328.98	51.215	0.156113
92	s4	2018-05-01		4.99966	102.796		Reservoir	limnetic	dry	meta	limnetic.dry.meta	25.9	20.734		7.7	0.63	2.276	522.442	170.751
93	s4	2018-05-01		4.99966	102.796		Reservoir	limnetic	dry	hypo	limnetic.dry.hypo	24.19	35.315		7.2	0.6	2.321	466.524	227.56
94	s4	2018-05-01		4.99966	102.796		Reservoir	limnetic	dry	hypo	limnetic.dry.hypo	23.65	64.275		4.4	0.38	3.97	591.122	511.133
95	s4	2018-05-01		4.99966	102.796		Reservoir	limnetic	dry	hypo	limnetic.dry.hypo	23.8	44.869		4.1	0.35	3.356	617.182	522.39
96	s5	2018-05-01		5.00796	102.84		Reservoir	limnetic	dry	epi	limnetic.dry.epi	30.33	5.43		104.3	7.84	2.088	218.212	1.75937
97	s5	2018-05-01		5.00796	102.84		Reservoir	limnetic	dry	epi	limnetic.dry.epi	30.28	10.12		105.1	7.91	1.959	232.614	1.80064
98	s5	2018-05-01		5.00796	102.84		Reservoir	limnetic	dry	epi	limnetic.dry.epi	30.81	0.5		103.1	7.69	2.848	212.368	1.89492	45.956	6435.38	62.7213	0.459149
99	s5	2018-05-01		5.00796	102.84		Reservoir	limnetic	dry	meta	limnetic.dry.meta	26.21	19.4		29.7	2.4	1.597	582.936	77.4106
100	s5	2018-05-01		5.00796	102.84		Reservoir	limnetic	dry	hypo	limnetic.dry.hypo	24.09	33.95		8.7	0.73	3.372	583.027	201.742
101	s5	2018-05-01		5.00796	102.84		Reservoir	limnetic	dry	hypo	limnetic.dry.hypo	23.76	48.22		3.9	0.33	2.812	882.501	678.716
102	s5	2018-05-01		5.00796	102.84		Reservoir	limnetic	dry	hypo	limnetic.dry.hypo	23.64	66.32		2.8	0.24	3.026	822.516	515.396
103	s6	2018-05-01		5.0201	102.903		Reservoir	limnetic	dry	epi	limnetic.dry.epi	29.94	5.46		107	8.1	3.475	227.401	3.3873
104	s6	2018-05-01		5.0201	102.903		Reservoir	limnetic	dry	epi	limnetic.dry.epi	30.27	0.5		103.9	7.82	2.754	216.721	15.8344	410.126	6418.98	62.3627	4.22774
105	s6	2018-05-01		5.0201	102.903		Reservoir	limnetic	dry	meta	limnetic.dry.meta	27.18	14.34		69	5.48	4.353	532.514	4.66838
106	s6	2018-05-01		5.0201	102.903		Reservoir	limnetic	dry	hypo	limnetic.dry.hypo	24.86	24.97		10.1	0.84	2.717	629.424	234.862
107	s6	2018-05-01		5.0201	102.903		Reservoir	limnetic	dry	hypo	limnetic.dry.hypo	23.77	46.07		2.9	0.25	2.121	926.239	654.677
108	s7	2018-05-01		4.96616	102.837		Reservoir	littoral	dry	epi	littoral.dry.epi	30.4	0.5		100.1	7.52	3.218	206.977	18.6173	483.195	6164.18	59.754	4.99426
109	s7	2018-05-01		4.96616	102.837		Reservoir	littoral	dry	epi	littoral.dry.epi	30.38	4.795		103.2	7.75	3.097	220.724	3.99191
110	s7	2018-05-01		4.96616	102.837		Reservoir	littoral	dry	meta	littoral.dry.meta	28.67	12.802		69.5	5.38	3.548	307.135	3.08915
111	s7	2018-05-01		4.96616	102.837		Reservoir	littoral	dry	hypo	littoral.dry.hypo	26.15	19.773		15.6	1.26	4.291	475.826	2.01054
112	s1	2018-07-01		5.12107	102.79		Reservoir	littoral	dry	epi	littoral.dry.epi	31.2	0.5		101.1	7.48	2.25191	181.498	0.570674	14.9966	5591.41	54.0809	0.136659
113	s1	2018-07-01		5.12107	102.79		Reservoir	littoral	dry	epi	littoral.dry.epi	30.52	3.6		99.9	7.48	2.12791	169.423	0.457788
114	s1	2018-07-01		5.12107	102.79		Reservoir	littoral	dry	epi	littoral.dry.epi	30.25	9.7		97.2	7.32	2.04391	180.695	0.646841
115	s1	2018-07-01		5.12107	102.79		Reservoir	littoral	dry	meta	littoral.dry.meta	28.02	15.6		44	3.45	1.88891	365.934	0.19782
116	s1	2018-07-01		5.12107	102.79		Reservoir	littoral	dry	hypo	littoral.dry.hypo	25.74	20.6		13.6	1.11	1.48491	450.543	74.9944
117	s2	2018-07-01		5.09415	102.817		Reservoir	littoral	dry	epi	littoral.dry.epi	31.15	0.5		101.5	7.52	2.34291	197.737	1.7713	46.5115	6078.83	59.15	0.467628
118	s2	2018-07-01		5.09415	102.817		Reservoir	littoral	dry	epi	littoral.dry.epi	30.45	4.591		100.4	7.53	1.91391	178.192	0.508022
119	s2	2018-07-01		5.09415	102.817		Reservoir	littoral	dry	epi	littoral.dry.epi	30.14	10.587		96.5	7.28	2.21591	194.62	0.445232
120	s2	2018-07-01		5.09415	102.817		Reservoir	littoral	dry	meta	littoral.dry.meta	27.94	14.984		40.7	3.19	2.08291	358.912	20.2642
121	s3	2018-07-01		5.05075	102.825		Reservoir	limnetic	dry	epi	limnetic.dry.epi	30.39	4.425		99.4	7.46	2.02436	202.623	0.292112
122	s3	2018-07-01		5.05075	102.825		Reservoir	limnetic	dry	epi	limnetic.dry.epi	30.22	9.884		98.7	7.43	2.26336	207.202	0.344629
123	s3	2018-07-01		5.05075	102.825		Reservoir	limnetic	dry	epi	limnetic.dry.epi	31.01	0.5		100.7	7.48	2.11491	190.715	0.335273	8.78476	5828.34	56.4746	0.0711074
124	s3	2018-07-01		5.05075	102.825		Reservoir	limnetic	dry	meta	limnetic.dry.meta	26.42	18.178		21.2	1.71	1.34536	433.188	19.4378
125	s3	2018-07-01		5.05075	102.825		Reservoir	limnetic	dry	hypo	limnetic.dry.hypo	24.31	30.47		9.2	0.77	0.898464	391.466	0.888056
126	s3	2018-07-01		5.05075	102.825		Reservoir	limnetic	dry	hypo	limnetic.dry.hypo	23.77	47.688		4.7	0.4	1.26836	690.765	444.931
127	s3	2018-07-01		5.05075	102.825		Reservoir	limnetic	dry	hypo	limnetic.dry.hypo	23.66	58.837		3.3	0.28	1.65436	539.153	281.495
128	s4	2018-07-01		4.99966	102.796		Reservoir	limnetic	dry	epi	limnetic.dry.epi	30.35	4.089		98.8	7.42	1.75446	180.807	0.313351
129	s4	2018-07-01		4.99966	102.796		Reservoir	limnetic	dry	epi	limnetic.dry.epi	30.21	10.254		97.8	7.37	1.90736	186.7	0.507449
130	s4	2018-07-01		4.99966	102.796		Reservoir	limnetic	dry	epi	limnetic.dry.epi	29.43	13.902		75.4	5.76	1.81536	452.579	47.0807
131	s4	2018-07-01		4.99966	102.796		Reservoir	limnetic	dry	epi	limnetic.dry.epi	30.6	0.5		98.9	7.4	1.76836	228.104	0.818341	8.15824	5430.54	52.1856	0.0641115
132	s4	2018-07-01		4.99966	102.796		Reservoir	limnetic	dry	meta	limnetic.dry.meta	25.98	21.521		30.5	2.48	2.13236	663.863	352.97
133	s5	2018-07-01		5.00796	102.84		Reservoir	limnetic	dry	epi	limnetic.dry.epi	30.23	4.49		98	7.38	2.24246	161.193	0.154973
134	s5	2018-07-01		5.00796	102.84		Reservoir	limnetic	dry	epi	limnetic.dry.epi	30.17	10.78		97.5	7.35	1.93446	193.49	0.358483
135	s5	2018-07-01		5.00796	102.84		Reservoir	limnetic	dry	meta	limnetic.dry.meta	26.03	20.81		20.7	1.68	2.61445	641.791	297.427
136	s5	2018-07-01		5.00796	102.84		Reservoir	limnetic	dry	hypo	limnetic.dry.hypo	24.02	35.69		5.2	0.44	1.64245	673.502	502.855
137	s5	2018-07-01		5.00796	102.84		Reservoir	limnetic	dry	hypo	limnetic.dry.hypo	23.72	51.13		5.2	0.44	2.33494	641.187	556.534
138	s5	2018-07-01		5.00796	102.84		Reservoir	limnetic	dry	hypo	limnetic.dry.hypo	23.65	61.55		3	0.25	2.58046	644.021	515.693
139	s5	2018-07-01		5.00796	102.84		Reservoir	limnetic	dry	epi	limnetic.dry.epi	30.3	0.5		98	7.38	1.74546	164.829	0.14018	3.63251	4780.38	45.3492	0.0169185
140	s6	2018-07-01		5.0201	102.903		Reservoir	limnetic	dry	epi	limnetic.dry.epi	30.26	6.25		98.7	7.43	1.99011	180.13	1.43403
141	s6	2018-07-01		5.0201	102.903		Reservoir	limnetic	dry	epi	limnetic.dry.epi	30.31	0.5		99.8	7.5	1.90046	203.864	16.6927	432.63	6048.39	58.5246	4.46348
142	s6	2018-07-01		5.0201	102.903		Reservoir	limnetic	dry	meta	limnetic.dry.meta	27.96	14.77		63.4	4.97	1.96611	380.694	42.0757
143	s6	2018-07-01		5.0201	102.903		Reservoir	limnetic	dry	hypo	limnetic.dry.hypo	24.6	25.9		6	0.5	1.09111	483.201	121.956
144	s6	2018-07-01		5.0201	102.903		Reservoir	limnetic	dry	hypo	limnetic.dry.hypo	23.94	36.01		3.5	0.29	1.17111	572.706	346.312
145	s6	2018-07-01		5.0201	102.903		Reservoir	limnetic	dry	hypo	limnetic.dry.hypo	23.76	44.69		2.9	0.25	1.44946	635.293	443.914
146	s7	2018-07-01		4.96616	102.837		Reservoir	littoral	dry	epi	littoral.dry.epi	30.18	4.285		98	7.38	3.01011	194.948	1.42836
147	s7	2018-07-01		4.96616	102.837		Reservoir	littoral	dry	epi	littoral.dry.epi	30.16	6.089		97.6	7.35	1.83011	197.664	1.11641
148	s7	2018-07-01		4.96616	102.837		Reservoir	littoral	dry	epi	littoral.dry.epi	30.15	8.211		97.3	7.33	2.34811	204.051	0.956959
149	s7	2018-07-01		4.96616	102.837		Reservoir	littoral	dry	epi	littoral.dry.epi	30.17	0.5		102.1	7.7	2.20911	182.721	1.73172	44.7827	5389.11	51.6423	0.442541
150	s1	2018-11-01		5.12107	102.79		Reservoir	littoral	wet	epi	littoral.wet.epi	29.04	0.5		95.4	7.33	1.8098	158.684	0.739937	18.7915	4461.73	102.1	0.417319
151	s1	2018-11-01		5.12107	102.79		Reservoir	littoral	wet	epi	littoral.wet.epi	28.93	3.8		94	7.24	1.9158	128.501	0.583809
152	s1	2018-11-01		5.12107	102.79		Reservoir	littoral	wet	epi	littoral.wet.epi	28.83	10.6		91.5	7.06	1.9058	140.056	0.521235
153	s1	2018-11-01		5.12107	102.79		Reservoir	littoral	wet	meta	littoral.wet.meta	27.48	16.4		66.8	5.28	1.8727	235.607	0.421
154	s2	2018-11-01		5.09415	102.817		Reservoir	littoral	wet	epi	littoral.wet.epi	29.32	0.5		99.8	7.63	2.0108	160.432	0.587514	20.6227	4481.22	102.639	0.464358
155	s2	2018-11-01		5.09415	102.817		Reservoir	littoral	wet	epi	littoral.wet.epi	29.09	3.501		91.9	7.06	1.9098	154.561	2.49879
156	s2	2018-11-01		5.09415	102.817		Reservoir	littoral	wet	epi	littoral.wet.epi	29	8.19		83.7	6.44	1.8348	141.295	0.873264
157	s2	2018-11-01		5.09415	102.817		Reservoir	littoral	wet	epi	littoral.wet.epi	28.96	15.209		81.2	6.25	1.7678	161.72	0.808368
158	s3	2018-11-01		5.05075	102.825		Reservoir	limnetic	wet	epi	limnetic.wet.epi	29.1	3.931		89.6	6.86	1.7324	136.774	0.457482
159	s3	2018-11-01		5.05075	102.825		Reservoir	limnetic	wet	epi	limnetic.wet.epi	29.04	10.194		86.5	6.65	1.7554	152.171	0.80434
160	s3	2018-11-01		5.05075	102.825		Reservoir	limnetic	wet	epi	limnetic.wet.epi	29.08	0.5		100.2	7.67	1.8068	172.266	0.363959	9.24916	4851.81	111.948	0.180246
161	s3	2018-11-01		5.05075	102.825		Reservoir	limnetic	wet	meta	limnetic.wet.meta	26.63	20.215		40.4	3.24	1.7224	404.972	141.15
162	s3	2018-11-01		5.05075	102.825		Reservoir	limnetic	wet	hypo	limnetic.wet.hypo	24.17	30.851		8.8	0.73	1.2174	392.223	88.8999
163	s3	2018-11-01		5.05075	102.825		Reservoir	limnetic	wet	hypo	limnetic.wet.hypo	23.86	44.113		5.8	0.49	1.6284	656.336	505.994
164	s3	2018-11-01		5.05075	102.825		Reservoir	limnetic	wet	hypo	limnetic.wet.hypo	23.69	70.6		4.4	0.37	1.8628	581.407	400.896
165	s3	2018-11-01		5.05075	102.825		Reservoir	limnetic	wet	hypo	limnetic.wet.hypo	23.72	59.346		4.2	0.36	1.7424	607.062	422.537
166	s4	2018-11-01		4.99966	102.796		Reservoir	limnetic	wet	epi	limnetic.wet.epi	29.41	4.285		93.6	7.15	1.906	174.95	2.27282
167	s4	2018-11-01		4.99966	102.796		Reservoir	limnetic	wet	epi	limnetic.wet.epi	29.14	11.177		89.4	6.86	2.4914	172.171	1.85607
168	s4	2018-11-01		4.99966	102.796		Reservoir	limnetic	wet	epi	limnetic.wet.epi	29.39	0.5		100.7	7.7	1.8834	196.312	0.887014	477.155	5099.72	118.268	11.8581
169	s4	2018-11-01		4.99966	102.796		Reservoir	limnetic	wet	meta	limnetic.wet.meta	26.15	20.674		16.5	1.33	1.8294	719.398	503.81
170	s4	2018-11-01		4.99966	102.796		Reservoir	limnetic	wet	hypo	limnetic.wet.hypo	24.04	34.032		4	0.34	2.0094	875.353	983.436
171	s5	2018-11-01		5.00796	102.84		Reservoir	limnetic	wet	epi	limnetic.wet.epi	29.1	3.93		89.8	6.87	1.461	156.256	0.763493
172	s5	2018-11-01		5.00796	102.84		Reservoir	limnetic	wet	epi	limnetic.wet.epi	29.08	10.22		88.9	6.81	1.71	148.622	1.04586
173	s5	2018-11-01		5.00796	102.84		Reservoir	limnetic	wet	meta	limnetic.wet.meta	27.09	19.81		36.2	2.87	1.536	674.127	387.064
174	s5	2018-11-01		5.00796	102.84		Reservoir	limnetic	wet	hypo	limnetic.wet.hypo	24.03	36.32		8.2	0.69	2.222	712.658	760.017
175	s5	2018-11-01		5.00796	102.84		Reservoir	limnetic	wet	hypo	limnetic.wet.hypo	23.8	49.43		4.6	0.39	1.964	707.277	642.97
176	s5	2018-11-01		5.00796	102.84		Reservoir	limnetic	wet	hypo	limnetic.wet.hypo	23.72	60.41		4	0.34	1.823	723.292	607.933
177	s5	2018-11-01		5.00796	102.84		Reservoir	limnetic	wet	epi	limnetic.wet.epi	29.3	0.5		100.8	7.67	1.743	142.554	0.811343	19.4716	4052.52	91.8142	0.435549
178	s6	2018-11-01		5.0201	102.903		Reservoir	limnetic	wet	epi	limnetic.wet.epi	29.02	4.52		93.7	7.15	1.3973	147.705	2.98356
179	s6	2018-11-01		5.0201	102.903		Reservoir	limnetic	wet	epi	limnetic.wet.epi	28.94	11.85		91.9	7.04	0.9683	160.605	2.60349
180	s6	2018-11-01		5.0201	102.903		Reservoir	limnetic	wet	epi	limnetic.wet.epi	28.69	15.34		90.5	6.96	1.1393	161.757	7.06692
181	s6	2018-11-01		5.0201	102.903		Reservoir	limnetic	wet	epi	limnetic.wet.epi	29.03	0.5		101.1	7.7	1.675	178.598	1.73656	503.816	4744.53	109.234	12.4702
182	s6	2018-11-01		5.0201	102.903		Reservoir	limnetic	wet	meta	limnetic.wet.meta	25.11	23.73		21.2	1.74	1.0163	651.637	597.649
183	s6	2018-11-01		5.0201	102.903		Reservoir	limnetic	wet	hypo	limnetic.wet.hypo	23.99	35.57		6	0.5	1.3363	573.368	422.438
184	s6	2018-11-01		5.0201	102.903		Reservoir	limnetic	wet	hypo	limnetic.wet.hypo	23.79	49.65		4.3	0.36	1.76	690.086	607.024
185	s7	2018-11-01		4.96616	102.837		Reservoir	littoral	wet	epi	littoral.wet.epi	29.12	4.878		96.3	6.73	2.3683	118.813	1.14645
186	s7	2018-11-01		4.96616	102.837		Reservoir	littoral	wet	epi	littoral.wet.epi	29.11	6.661		96	6.75	1.0483	125.188	1.14687
187	s7	2018-11-01		4.96616	102.837		Reservoir	littoral	wet	epi	littoral.wet.epi	29.1	8.905		95.4	6.75	1.4183	110.444	1.31742
188	s7	2018-11-01		4.96616	102.837		Reservoir	littoral	wet	epi	littoral.wet.epi	29.08	11.531		95	6.79	1.4563	155.387	1.3286
189	s7	2018-11-01		4.96616	102.837		Reservoir	littoral	wet	epi	littoral.wet.epi	29.2	0.5		101	6.92	1.2933	143.367	1.3278	33.8086	4058.43	91.9468	0.792012
190	L1	2018-03-01		5.02856	102.917	Forest reserve	River	High discharge	Wet	Surface	High discharge.Wet.Surface	26.69			55.5	4.35		30.3068	36.5452	969.633	1193.84	5.17386	10.6915
191	L2	2018-03-01		5.04993	102.936	Low density residential	River	High discharge	Wet	Surface	High discharge.Wet.Surface	27.37			62.2	4.91		23.5635	6.80882	768.544	225.029	3.29263	2.01142
192	L3	2018-03-01		5.06267	102.957	Agriculture	River	High discharge	Wet	Surface	High discharge.Wet.Surface	28.4			79.8	5.05		25.0041	3.24925	839.444	109.254	3.94868	0.976495
193	L4	2018-03-01		5.0582	102.965	Low density residential	River	High discharge	Wet	Surface	High discharge.Wet.Surface	28.4
194	L5	2018-03-01		5.07284	103.005	High density residential and intersection of connecting tributaries (Berang River)	River	High discharge	Wet	Surface	High discharge.Wet.Surface	28.39			74.9	5.81		28.5467	0.269657	958.107	9.06556	5.05263	0.064322
195	L6	2018-03-01		5.12433	103.017	High density residential	River	High discharge	Wet	Surface	High discharge.Wet.Surface	28.16			75.7	5.85		35.0392	0.497958	1168.48	16.6771	7.01031	0.133311
196	L7	2018-03-01		5.18192	103.042	Sand mining (70%), aquaculture (20%), agriculture (10%)	River	High discharge	Wet	Surface	High discharge.Wet.Surface	28.02			75.5	5.91		38.3735	1.23697	1274.66	41.3307	7.99903	0.356762
197	L8	2018-03-01		5.21275	103.028	Sand Mining	River	High discharge	Wet	Surface	High discharge.Wet.Surface	26.68			73.4	5.83		15.2573	1.91907	488.002	62.6804	0.681018	0.544296
198	L9	2018-03-01		5.2314	103.036	Sand mining (85%), agriculture (10%), aquaculture (5%)	River	High discharge	Wet	Surface	High discharge.Wet.Surface	27.92			77.6	6.07		48.2466	4.23085	1598.14	141.129	11.0099	1.26084
199	L10	2018-03-01		5.25385	103.035	Sand Mining	River	High discharge	Wet	Surface	High discharge.Wet.Surface	27.65			77.2	6.05		106.447	8.23078	3499.35	273.314	28.7116	2.45277
200	L11	2018-03-01		5.26846	103.044	High density residential (90%), sand mining (10%)	River	High discharge	Wet	Surface	High discharge.Wet.Surface	27.35			78.4	6.19		44.1857	1.03267	1440.34	34.1177	9.54954	0.289611
201	L12	2018-03-01		5.27118	103.068	Aquaculture	River	High discharge	Wet	Surface	High discharge.Wet.Surface	27.47			82.1	6.47		39.1365	0.532371	1280.07	17.6245	8.0551	0.141031
202	L13	2018-03-01		5.27873	103.077	Sand mining (5%), aquaculture (95%)	River	High discharge	Wet	Surface	High discharge.Wet.Surface	28.27			100	7.85		47.7403	0.448576	1596.94	15.0507	10.9961	0.118666
203	L1	2018-04-01		5.02856	102.917	Forest reserve	River	High discharge	Wet	Surface	High discharge.Wet.Surface	26.8			37.5	2.98		139.481	32.6198	4476.49	1067.63	37.8757	9.56714
204	L2	2018-04-01		5.04993	102.936	Low density residential	River	High discharge	Wet	Surface	High discharge.Wet.Surface	28.8			58.5	4.54		63.6061	5.40663	2159.32	182.994	16.2298	1.65481
205	L3	2018-04-01		5.06267	102.957	Agriculture	River	High discharge	Wet	Surface	High discharge.Wet.Surface	27.8			48.1	3.72		97.9101	6.40643	3232.3	213.271	26.2204	1.91251
206	L4	2018-04-01		5.0582	102.965	Low density residential	River	High discharge	Wet	Surface	High discharge.Wet.Surface	28.7			65.5	5.05		79.7701	3.55954	2700.54	120.28	21.2641	1.08025
207	L5	2018-04-01		5.07284	103.005	High density residential and intersection of connecting tributaries (Berang River)	River	High discharge	Wet	Surface	High discharge.Wet.Surface	28.8			74.3	5.78		56.1281	1.03722	1905.46	35.106	13.8677	0.302684
208	L6	2018-04-01		5.12433	103.017	High density residential	River	High discharge	Wet	Surface	High discharge.Wet.Surface	28.9			78.6	6.11		52.2182	2.04498	1777.65	69.3279	12.6797	0.616251
209	L7	2018-04-01		5.18192	103.042	Sand mining (70%), aquaculture (20%), agriculture (10%)	River	High discharge	Wet	Surface	High discharge.Wet.Surface	29.9			79.5	6.07		411.377	21.4191	14396.7	737.935	130.39	6.81941
210	L8	2018-04-01		5.21275	103.028	Sand Mining	River	High discharge	Wet	Surface	High discharge.Wet.Surface	28.2			69.7	5.51		86.1973	2.5505	2877.71	85.4754	22.9124	0.758496
211	L9	2018-04-01		5.2314	103.036	Sand mining (85%), agriculture (10%), aquaculture (5%)	River	High discharge	Wet	Surface	High discharge.Wet.Surface	30.6			76.9	5.52		99.7157	18.1607	3557.25	632.616	29.3988	5.90337
212	L10	2018-04-01		5.25385	103.035	Sand Mining	River	High discharge	Wet	Surface	High discharge.Wet.Surface	28.7			60.4	4.14		445.228	64.9818	15072.8	2195.79	136.373	20.0359
213	L11	2018-04-01		5.26846	103.044	High density residential (90%), sand mining (10%)	River	High discharge	Wet	Surface	High discharge.Wet.Surface	28.1			81	6.35		104.615	1.23038	3482.81	41.1655	28.5437	0.355533
214	L12	2018-04-01		5.27118	103.068	Aquaculture	River	High discharge	Wet	Surface	High discharge.Wet.Surface	27.3			73.2	5.84		83.4595	1.46325	2716.73	48.3024	21.4394	0.417343
215	L13	2018-04-01		5.27873	103.077	Sand mining (5%), aquaculture (95%)	River	High discharge	Wet	Surface	High discharge.Wet.Surface	27.4			65.9	5.2		101.603	0.721287	3316.66	23.8504	27.0222	0.197111
216	L1	2019-04-01		5.02856	102.917	Forest reserve	River	Low discharge	Dry	Surface	Low discharge.Dry.Surface	27			32.4	2.56		194.491	4.3957	6277.47	144.363	54.6426	1.28009
217	L2	2019-04-01		5.04993	102.936	Low density residential	River	Low discharge	Dry	Surface	Low discharge.Dry.Surface	31			100.1	7.4		117.839	0.189749	4249.83	6.65102	35.9715	0.0438238
218	L3	2019-04-01		5.06267	102.957	Agriculture	River	Low discharge	Dry	Surface	Low discharge.Dry.Surface	29.2			55.8	4.25		210.621	0.636096	7229.99	21.6701	63.4398	0.18066
219	L4	2019-04-01		5.0582	102.965	Low density residential	River	Low discharge	Dry	Surface	Low discharge.Dry.Surface	29.7			67.9	5.14		132.91	0.748478	4625.84	25.7045	39.2435	0.21907
220	L5	2019-04-01		5.07284	103.005	High density residential and intersection of connecting tributaries (Berang River)	River	Low discharge	Dry	Surface	Low discharge.Dry.Surface	28.1			66.8	5.21		189.459	0.448379	6307.44	15.0016	54.8248	0.118025
221	L6	2019-04-01		5.12433	103.017	High density residential	River	Low discharge	Dry	Surface	Low discharge.Dry.Surface	28			90.3	7.06		118.602	1.11828	3937.44	37.3527	32.7763	0.320617
222	L7	2019-04-01		5.18192	103.042	Sand mining (70%), aquaculture (20%), agriculture (10%)	River	Low discharge	Dry	Surface	Low discharge.Dry.Surface	29.5			72.5	5.53		127.792	1.1921	4423.25	40.8087	37.3352	0.357743
223	L8	2019-04-01		5.21275	103.028	Sand Mining	River	Low discharge	Dry	Surface	Low discharge.Dry.Surface	30.2			65.4	4.92		123.292	1.1515	4350.45	39.8607	36.7449	0.352304
224	L9	2019-04-01		5.2314	103.036	Sand mining (85%), agriculture (10%), aquaculture (5%)	River	Low discharge	Dry	Surface	Low discharge.Dry.Surface	29.4			72.8	5.56		115.943	2.84389	4002.05	97.1971	33.4042	0.876449
225	L10	2019-04-01		5.25385	103.035	Sand Mining	River	Low discharge	Dry	Surface	Low discharge.Dry.Surface	29.2			63.8	4.89		106.431	0.446197	3653.45	15.2007	30.1463	0.121242
226	L11	2019-04-01		5.26846	103.044	High density residential (90%), sand mining (10%)	River	Low discharge	Dry	Surface	Low discharge.Dry.Surface	28.9			81.1	6.25		42.807	0.0012421	1457.27	0.0421092	9.69849	-0.0179205
227	L12	2019-04-01		5.27118	103.068	Aquaculture	River	Low discharge	Dry	Surface	Low discharge.Dry.Surface	28.5			59.4	4.6		166.365	1.64677	5600.83	55.4629	48.2448	0.487252
228	L13	2019-04-01		5.27873	103.077	Sand mining (5%), aquaculture (95%)	River	Low discharge	Dry	Surface	Low discharge.Dry.Surface	28.4			58.9	4.57		141.448	1.99178	4748.71	66.9723	40.3173	0.591542
229	E1	2017-06-12		5.27868	103.08	0	River estuary	High flow	Wet	surface	High flow.Wet.surface	26.639	0.557	0	62.4	5	6.031	32.5737	11.3959	875.59	278.29	27.7189	15.9812
230	E1	2017-06-12		5.27868	103.08	0	River estuary	High flow	Wet	mid	High flow.Wet.mid	26.624	2.919	0	61.5	4.94	2.209	23.6837	19.5689	638.183	478.699
231	E1	2017-06-12		5.27868	103.08	0	River estuary	High flow	Wet	bottom	High flow.Wet.bottom	26.618	4.962	0	61.2	4.91	4.235	27.4713	14.7214	752.473	362.593
232	E2	2017-06-12		5.28248	103.088	0	River estuary	High flow	Wet	surface	High flow.Wet.surface	26.6625	0.5	0	0	0	3.391	37.6977	14.6777	1074.76	367.035	39.7026	21.118
233	E2	2017-06-13		5.28248	103.088	0	River estuary	High flow	Wet	mid	High flow.Wet.mid	26.624	1.346	0	0	0	4.673	35.6402	10.2445	1005.75	255.324
234	E2	2017-06-12		5.28248	103.088	0	River estuary	High flow	Wet	bottom	High flow.Wet.bottom	26.607	5.073	0	61.9	4.96	5.336	30.485	13.4377	856.485	334.347
235	E3	2017-06-12		5.288	103.095	0	River estuary	High flow	Wet	surface	High flow.Wet.surface	26.686	0.329	0	63.8	5.11	6.451	23.3611	14.0927	660.061	351.233	14.7461	20.2074
236	E3	2017-06-12		5.288	103.095	0	River estuary	High flow	Wet	mid	High flow.Wet.mid	26.671	3.401	0	61.6	4.94	4.242	26.7743	13.1599	746.293	326.337
237	E3	2017-06-12		5.288	103.095	0	River estuary	High flow	Wet	bottom	High flow.Wet.bottom	26.649	7.758	0	61.1	4.9	3.895	21.4702	15.8106	603.213	393.389
238	E4	2017-06-12		5.29461	103.091	0	River estuary	High flow	Wet	surface	High flow.Wet.surface	26.649	0.271	0	61.6	4.94	4.426	25.0645	12.5091	764.49	321.08	21.0321	18.4576
239	E4	2017-06-12		5.29461	103.091	0	River estuary	High flow	Wet	mid	High flow.Wet.mid	26.648	2.113	0	58.8	4.71	5.396	31.451	11.1178	858.609	273.367
240	E4	2017-06-12		5.29461	103.091	0	River estuary	High flow	Wet	bottom	High flow.Wet.bottom	26.649	3.157	0	58.6	4.7	3.671	28.5839	10.3933	790.163	256.861
241	E5	2017-06-12		5.30262	103.087	0	River estuary	High flow	Wet	surface	High flow.Wet.surface	26.663	0.579	0	61.8	4.95	3.45	29.7092	11.5278	804.224	282.481	23.4224	16.2265
242	E5	2017-06-12		5.30262	103.087	0	River estuary	High flow	Wet	mid	High flow.Wet.mid	26.649	3.09	0	61.5	4.93	4.332	27.774	6.07527	767.5	150.145
243	E5	2017-06-12		5.30262	103.087	0	River estuary	High flow	Wet	bottom	High flow.Wet.bottom	26.648	4.728	0	61.2	4.91	3.459	26.1804	12.8144	711.074	314.546
244	E6	2017-06-12		5.31147	103.089	0	River estuary	High flow	Wet	surface	High flow.Wet.surface	26.673	0.314	0	62.9	5.04	4.02	27.9181	11.0025	758.944	270.071	20.6969	15.5096
245	E6	2017-06-12		5.31147	103.089	0	River estuary	High flow	Wet	mid	High flow.Wet.mid	26.666	2.62	0	60.3	4.83	4.449	15.5255	11.7302	425.565	288.919
246	E6	2017-06-12		5.31147	103.089	0	River estuary	High flow	Wet	bottom	High flow.Wet.bottom	26.665	3.749	0	59.7	4.79	4.73	32.5965	10.8777	889.248	267.465
247	E7	2017-06-12		5.31967	103.092	0	River estuary	High flow	Wet	surface	High flow.Wet.surface	26.68	0.252	0	65	5.21	3.726	83.2564	8.13978	2291.79	200.826	112.934	11.504
248	E7	2017-06-12		5.31967	103.092	0	River estuary	High flow	Wet	mid	High flow.Wet.mid	26.674	1.045	0	61.6	4.94	5.274	69.283	9.06326	1875.15	222.089
249	E7	2017-06-12		5.31967	103.092	0	River estuary	High flow	Wet	bottom	High flow.Wet.bottom	26.673	2.472	0	61	4.89	4.026	59.6035	9.41651	1619.15	231.141
250	E8	2017-06-12		5.32439	103.1	0	River estuary	High flow	Wet	surface	High flow.Wet.surface	26.701	1.251	0	61.5	4.93	3.964	9.70578	10.2111	263.896	250.646	-9.09202	14.3888
251	E8	2017-06-12		5.32439	103.1	0	River estuary	High flow	Wet	mid	High flow.Wet.mid	26.703	4.649	0	60.3	4.83	3.238	13.28	10.806	359.359	264.793
252	E8	2017-06-12		5.32439	103.1	0	River estuary	High flow	Wet	bottom	High flow.Wet.bottom	26.709	7.067	0	59.7	4.78	4.805	12.7411	9.45089	349.929	232.778
253	E9	2017-06-12		5.32511	103.108	0	River estuary	High flow	Wet	surface	High flow.Wet.surface	26.173	1.198	0	53.5	4.33	5.713	8.5334	3.14532	228.004	76.6768	-11.2705	4.30528
254	E9	2017-06-12		5.32511	103.108	0	River estuary	High flow	Wet	mid	High flow.Wet.mid	26.169	2.291	0	53.3	4.31	7.853	12.2398	2.9287	325.539	71.2725
255	E9	2017-06-12		5.32511	103.108	0	River estuary	High flow	Wet	bottom	High flow.Wet.bottom	26.171	3.929	0	53	4.29	4.77	10.313	2.67257	274.292	65.0394
256	E10	2017-06-12		5.32416	103.117	0	River estuary	High flow	Wet	surface	High flow.Wet.surface	26.697	0.888	1.666	59.8	4.79	6.578	11.3936	7.67541	302.031	186.457	-6.38888	10.0497
257	E10	2017-06-12		5.32416	103.117	0	River estuary	High flow	Wet	mid	High flow.Wet.mid	26.701	2.091	1.735	59.4	4.76	5.386	6.94498	0.177284	188.038	4.34392
258	E10	2017-06-12		5.32416	103.117	0	River estuary	High flow	Wet	bottom	High flow.Wet.bottom	26.7	2.169	1.666	59.4	4.76	4.777	12.5632	8.03191	338.72	196.466
259	E11	2017-06-12		5.32429	103.126	0	River estuary	High flow	Wet	surface	High flow.Wet.surface	26.567	0.573	3.619	60.4	4.85	4.32	20.9931	7.21802	563.526	176.243	8.33182	9.37341
260	E11	2017-06-12		5.32429	103.126	0	River estuary	High flow	Wet	mid	High flow.Wet.mid	26.56	1.504	3.339	59.8	4.8	5.325	20.0357	7.22354	537.838	176.38
261	E11	2017-06-12		5.32429	103.126	0	River estuary	High flow	Wet	bottom	High flow.Wet.bottom	26.547	2.123	2.779	59	4.74	3.931	17.6588	7.48092	476.064	182.981
262	E12	2017-06-12		5.33121	103.13	0	River estuary	High flow	Wet	surface	High flow.Wet.surface	26.603	0.287	5.451	65.6	5.26	4.438	22.0202	8.04671	593.519	196.801	9.93336	10.3667
263	E12	2017-06-12		5.33121	103.13	0	River estuary	High flow	Wet	mid	High flow.Wet.mid	26.596	1.044	5.948	61.3	4.92	5.805	21.3415	8.57223	575.206	209.65
264	E12	2017-06-12		5.33121	103.13	0	River estuary	High flow	Wet	bottom	High flow.Wet.bottom	26.606	4.501	10.987	59.3	4.76	4.908	20.0146	6.46946	541.516	158.457
265	E13	2017-06-12		5.33909	103.133	0	River estuary	High flow	Wet	surface	High flow.Wet.surface	26.635	1.047	8.881	60.4	4.85	5.856	25.9724	6.5479	702.826	160.395	15.7759	8.25841
266	E13	2017-06-12		5.33909	103.133	0	River estuary	High flow	Wet	mid	High flow.Wet.mid	26.626	3.419	8.665	59.7	4.79	4.478	28.9499	6.24633	783.413	153.009
267	E13	2017-06-12		5.33909	103.133	0	River estuary	High flow	Wet	bottom	High flow.Wet.bottom	26.579	5.976	14.433	58.7	4.71	4.384	33.0361	5.71175	889.818	139.647
268	E14	2017-06-12		5.33975	103.142	0	River estuary	High flow	Wet	surface	High flow.Wet.surface	26.717	0.496	14.507	61.3	4.91	3.912	31.9468	6.53251	864.12	159.982	24.0139	7.96674
269	E14	2017-06-12		5.33975	103.142	0	River estuary	High flow	Wet	mid	High flow.Wet.mid	26.607	4.943	16.74	58.7	4.71	4.908	39.6305	6.51703	1067.25	159.322
270	E14	2017-06-12		5.33975	103.142	0	River estuary	High flow	Wet	bottom	High flow.Wet.bottom	26.465	10.52	30.765	56.4	4.54	4.077	22.3658	4.26013	628.597	103.923
271	E15	2017-06-13		5.33975	103.142	0	River estuary	High flow	Wet	surface	High flow.Wet.surface											NA	NA
272	E15	2017-06-14		5.33975	103.142	0	River estuary	High flow	Wet	mid	High flow.Wet.mid											NA	NA
273	E15	2017-06-15		5.33975	103.142	0	River estuary	High flow	Wet	bottom	High flow.Wet.bottom											NA	NA
274	E1	2018-09-23		5.27868	103.08	0	River estuary	Low flow	dry	surface	Low flow.dry.surface	28.35	0.417	0.023	70.7	5.46	1.614	261.147	8.38733	7131.47	210.608	291.675	8.86086
275	E1	2018-09-23		5.27868	103.08	0	River estuary	Low flow	dry	mid	Low flow.dry.mid	28.19	2.437	0.022	68.5	5.32	1.913	228.985	6.83941	6211.01	171.285
276	E1	2018-09-23		5.27868	103.08	0	River estuary	Low flow	dry	bottom	Low flow.dry.bottom	28.16	4.59	0.021	64.2	5	0.9545	247.864	6.15351	6714.54	154.03
277	E2	2018-09-23		5.28248	103.088	0	River estuary	Low flow	dry	surface	Low flow.dry.surface	28.32	0.779	0.021	66.6	5.17	1.547	277.435	9.60293	7566.66	241.012	310.579	10.1494
278	E2	2018-09-23		5.28248	103.088	0	River estuary	Low flow	dry	mid	Low flow.dry.mid	28.21	3.525	0.021	65.5	5.1	1.204	242.917	5.44045	6594.47	136.294
279	E2	2018-09-23		5.28248	103.088	0	River estuary	Low flow	dry	bottom	Low flow.dry.bottom	28.19	3.473	0.021	64.7	5.04	1.453	287.518	7.7512	7798.66	194.119
280	E3	2018-09-23		5.288	103.095	0	River estuary	Low flow	dry	surface	Low flow.dry.surface	28.29	0.731	0.021	79.5	5.83	1.143	282.595	8.01787	7697.62	201.131	316.269	8.45335
281	E3	2018-09-23		5.288	103.095	0	River estuary	Low flow	dry	mid	Low flow.dry.mid	28.15	3.349	0.021	68	5	1.165	271.579	4.93816	7353.88	123.588
282	E3	2018-09-23		5.288	103.095	0	River estuary	Low flow	dry	bottom	Low flow.dry.bottom	28.14	5.757	0.021	64.4	4.73	3.032	284.896	5.30917	7711.21	132.851
283	E4	2018-09-23		5.29461	103.091	0	River estuary	Low flow	dry	surface	Low flow.dry.surface	28.23	0.5	0.021	76.6	5.81	1.126	292.251	4.95839	7940.47	124.259	326.822	5.18698
284	E4	2018-09-23		5.29461	103.091	0	River estuary	Low flow	dry	mid	Low flow.dry.mid	28.24	3	0.021	67.4	5.12	1.175	254.775	4.52522	6925.17	113.423
285	E4	2018-09-23		5.29461	103.091	0	River estuary	Low flow	dry	bottom	Low flow.dry.bottom	28.24	3.5	0.021	66.2	5.02	1.403	298.489	4.48857	8113.37	112.504
286	E5	2018-09-23		5.30262	103.087	0	River estuary	Low flow	dry	surface	Low flow.dry.surface	28.31	0.429	0.021	69.1	5.37	1.354	291.939	3.87624	7958.86	97.2692	327.612	4.0451
287	E5	2018-09-23		5.30262	103.087	0	River estuary	Low flow	dry	mid	Low flow.dry.mid	28.23	2.613	0.021	65.3	5.08	1.352	294.683	5.15109	8006.53	129.088
288	E5	2018-09-23		5.30262	103.087	0	River estuary	Low flow	dry	bottom	Low flow.dry.bottom	28.21	3.661	0.021	63.3	4.92	1.453	256.372	4.13722	6959.74	103.646
289	E6	2018-09-23		5.31147	103.089	0	River estuary	Low flow	dry	surface	Low flow.dry.surface	28.23	0.671	0.021	69.2	5.38	1.775	311.725	4.42357	8469.56	110.856	349.8	4.61836
290	E6	2018-09-23		5.31147	103.089	0	River estuary	Low flow	dry	mid	Low flow.dry.mid	28.23	2.054	0.021	63.8	4.96	1.469	286.709	4.8941	7789.87	122.648
291	E6	2018-09-23		5.31147	103.089	0	River estuary	Low flow	dry	bottom	Low flow.dry.bottom	28.23	2.847	0.021	62.4	4.83	1.491	317.369	4.65799	8622.92	116.731
292	E7	2018-09-23		5.31967	103.092	0	River estuary	Low flow	dry	surface	Low flow.dry.surface	28.31	0.374	0.021	73.2	5.54	1.856	274.545	3.76651	7484.67	94.5154	307.019	3.92817
293	E7	2018-09-23		5.31967	103.092	0	River estuary	Low flow	dry	mid	Low flow.dry.mid	28.29	2.082	0.021	66.1	5.01	1.134	271.215	4.10178	7387.62	102.895
294	E7	2018-09-23		5.31967	103.092	0	River estuary	Low flow	dry	bottom	Low flow.dry.bottom	28.29	2.853	0.021	62.2	4.84	1.263	305.641	3.93643	8325.36	98.7467
295	E8	2018-09-23		5.32439	103.1	0	River estuary	Low flow	dry	surface	Low flow.dry.surface	28.92	0.848	0.088	74.7	5.75	1.947	219.849	2.3076	6150.21	58.4892	249.049	2.41303
296	E8	2018-09-23		5.32439	103.1	0	River estuary	Low flow	dry	mid	Low flow.dry.mid	28.63	1.606	0.263	68.3	5.28	1.182	193.394	2.28833	5344.2	57.7253
297	E8	2018-09-23		5.32439	103.1	0	River estuary	Low flow	dry	bottom	Low flow.dry.bottom	28.5	3.617	0.438	63.4	4.92	1.79	155.864	2.24476	4283.49	56.5044
298	E9	2018-09-23		5.32511	103.108	0	River estuary	Low flow	dry	surface	Low flow.dry.surface	28.76	0.753	0.339	70.2	5.27	1.199	212.213	2.17956	5896.58	55.0983	237.749	2.2608
299	E9	2018-09-23		5.32511	103.108	0	River estuary	Low flow	dry	mid	Low flow.dry.mid	28.54	1.74	0.697	66.4	5.01	2.32	157.451	2.20172	4334.47	55.4562
300	E9	2018-09-23		5.32511	103.108	0	River estuary	Low flow	dry	bottom	Low flow.dry.bottom	28.74	4.425	8.028	65.9	4.85	0.8248	80.2496	1.87625	2228.24	47.382
301	E10	2018-09-23		5.32416	103.117	0	River estuary	Low flow	dry	surface	Low flow.dry.surface	28.79	0.704	0.463	75.7	5.81	3.294	170.102	2.22231	4732.5	56.206	187.165	2.307
302	E10	2018-09-23		5.32416	103.117	0	River estuary	Low flow	dry	mid	Low flow.dry.mid	28.74	1.888	2.458	69.2	5.29	1.487	131.78	2.08326	3658.7	52.6365
303	E10	2018-09-23		5.32416	103.117	0	River estuary	Low flow	dry	bottom	Low flow.dry.bottom	29.4	3.647	16.006	73.3	5.07	2.497	40.9128	1.25863	1168.32	32.0953
304	E11	2018-09-23		5.32429	103.126	0	River estuary	Low flow	dry	surface	Low flow.dry.surface	29.09	0.35	2.002	75	5.58	1.485	139.523	2.00142	3931.41	50.8592	143.281	1.96419
305	E11	2018-09-23		5.32429	103.126	0	River estuary	Low flow	dry	mid	Low flow.dry.mid	29	2.15	2.075	69.5	5.18	1.612	137.413	2.18845	3857.25	55.5305
306	E11	2018-09-23		5.32429	103.126	0	River estuary	Low flow	dry	bottom	Low flow.dry.bottom	29.06	3.514	2.187	28.6	2.08	2.227	111.408	1.58964	3135.23	40.3751
307	E12	2018-09-23		5.33121	103.13	0	River estuary	Low flow	dry	surface	Low flow.dry.surface	28.98	0.464	3.11	67.3	5.06	1.534	126.45	2.18224	3546.58	55.3494	126.988	2.12799
308	E12	2018-09-23		5.33121	103.13	0	River estuary	Low flow	dry	mid	Low flow.dry.mid	29.06	2.067	4.097	66.4	4.95	2.081	114.81	2.13123	3231.07	54.1205
309	E12	2018-09-23		5.33121	103.13	0	River estuary	Low flow	dry	bottom	Low flow.dry.bottom	29.19	4.005	4.168	67.9	5.04	1.581	116.861	1.9504	3306.95	49.632
310	E13	2018-09-23		5.33909	103.133	0	River estuary	Low flow	dry	surface	Low flow.dry.surface	29.25	0.353	3.272	75.6	5.54	1.511	128.983	1.87593	3659.19	47.7875	131.503	1.83011
311	E13	2018-09-23		5.33909	103.133	0	River estuary	Low flow	dry	mid	Low flow.dry.mid	29.13	1.808	3.967	70.6	5.17	1.461	116.559	2.15828	3290.02	54.87
312	E13	2018-09-23		5.33909	103.133	0	River estuary	Low flow	dry	bottom	Low flow.dry.bottom	29.13	2.774	4.977	69.2	5.06	1.275	105.437	2.09632	2976.15	53.2892
313	E14	2018-09-23		5.33975	103.142	0	River estuary	Low flow	dry	surface	Low flow.dry.surface	29.4	0.586	4.014	75.3	5.52	1.744	75.1057	1.64663	2144.3	42.044	69.8936	1.59627
314	E14	2018-09-23		5.33975	103.142	0	River estuary	Low flow	dry	mid	Low flow.dry.mid	29.23	4.458	6.781	69.5	5.08	1.235	64.1696	1.61467	1819.03	41.1038
315	E14	2018-09-23		5.33975	103.142	0	River estuary	Low flow	dry	bottom	Low flow.dry.bottom	29.21	8.081	18.368	75.5	5.37	0.827	27.4893	1.11904	778.745	28.4434
316	E15	2018-09-23		5.3434	103.149	0	River estuary	Low flow	dry	surface	Low flow.dry.surface	29.56	0.577	7.872	82.9	6.03	1.04	115.546	2.13201	3321.52	54.5529	115.609	2.05126
317	E15	2018-09-23		5.3434	103.149	0	River estuary	Low flow	dry	mid	Low flow.dry.mid	29.55	2.953	9.274	78.9	5.71	1.459	89.5616	1.84698	2573.54	47.2448
318	E15	2018-09-23		5.3434	103.149	0	River estuary	Low flow	dry	bottom	Low flow.dry.bottom	29.42	6.286	20.835	85.4	5.91	1.192	33.5515	1.30687	959.003	33.3181
319	E1	2018-12-23		5.27868	103.08	0	River estuary	High flow2	wet	surface	High flow2.wet.surface	27.5	0.861	0.0306	5.34	0	1.333	254.308	2.19727	6699.44	54.3953	362.699	2.93206
320	E1	2018-12-23		5.27868	103.08	0	River estuary	High flow2	wet	mid	High flow2.wet.mid	27.47	1.307	0.0319	5.37	0	1.337	244.933	2.0006	6444.3	49.5016
321	E1	2018-12-23		5.27868	103.08	0	River estuary	High flow2	wet	bottom	High flow2.wet.bottom	27.44	2.735	0.0775	5.35	0	1.679	256.12	1.5927	6730.08	39.3888
322	E2	2018-12-23		5.28248	103.088	0	River estuary	High flow2	wet	surface	High flow2.wet.surface	27.53	0.589	0.0319	5.48	0	1.374	249.856	1.98407	6590.52	49.1424	356.393	2.63876
323	E2	2018-12-23		5.28248	103.088	0	River estuary	High flow2	wet	mid	High flow2.wet.mid	27.51	1.875	0.0307	5.4	0	1.412	247.448	1.63009	6521.49	40.3611
324	E2	2018-12-23		5.28248	103.088	0	River estuary	High flow2	wet	bottom	High flow2.wet.bottom	27.51	3.059	0.0306	5.4	0	1.461	249.261	1.98023	6566.48	49.0222
325	E3	2018-12-23		5.288	103.095	0	River estuary	High flow2	wet	surface	High flow2.wet.surface	27.62	0.879	0.031	5.85	0	1.393	246.2	2.14161	6518.86	53.125	352.209	2.86394
326	E3	2018-12-23		5.288	103.095	0	River estuary	High flow2	wet	mid	High flow2.wet.mid	27.54	3.176	0.0327	5.77	0	1.382	245.954	1.84498	6490.35	45.7049
327	E3	2018-12-23		5.288	103.095	0	River estuary	High flow2	wet	bottom	High flow2.wet.bottom	27.53	5.363	0.0314	5.59	0	1.795	247.28	2.07339	6522.58	51.3546
328	E4	2018-12-23		5.29461	103.091	0	River estuary	High flow2	wet	surface	High flow2.wet.surface	27.62	0.523	0.01	5.83	0	1.528	271.356	2.20905	7184.94	54.7978	390.679	2.95802
329	E4	2018-12-23		5.29461	103.091	0	River estuary	High flow2	wet	mid	High flow2.wet.mid	27.6	1.909	0.01	5.81	0	2.218	264.412	1.86944	6995.14	46.3578
330	E4	2018-12-23		5.29461	103.091	0	River estuary	High flow2	wet	bottom	High flow2.wet.bottom	27.59	4.324	0.01	5.77	0	1.773	248.437	1.68288	6569.76	41.7245
331	E5	2018-12-23		5.30262	103.087	0	River estuary	High flow2	wet	surface	High flow2.wet.surface	27.77	0.655	0.01	6.07	0	1.79	257.286	2.00869	6855.75	49.9536	371.604	2.69019
332	E5	2018-12-23		5.30262	103.087	0	River estuary	High flow2	wet	mid	High flow2.wet.mid	27.62	2.131	0.01	5.98	0	1.829	269.107	1.81319	7125.38	44.9782
333	E5	2018-12-23		5.30262	103.087	0	River estuary	High flow2	wet	bottom	High flow2.wet.bottom	27.64	3.182	0.01	5.86	0	1.707	250.262	1.60503	6632.03	39.828
334	E6	2018-12-23		5.31147	103.089	0	River estuary	High flow2	wet	surface	High flow2.wet.surface	26.62	0.044	0.036	6.02	0	1.636	255.988	1.91609	6497.3	46.7266	351.753	2.48547
335	E6	2018-12-23		5.31147	103.089	0	River estuary	High flow2	wet	mid	High flow2.wet.mid	27.72	1.903	0.0319	5.79	0	1.67	255.643	1.91661	6797.59	47.6237
336	E6	2018-12-23		5.31147	103.089	0	River estuary	High flow2	wet	bottom	High flow2.wet.bottom	27.72	2.271	0.0319	5.78	0	1.561	258.589	1.78103	6875.92	44.2548
337	E7	2018-12-23		5.31967	103.092	0	River estuary	High flow2	wet	surface	High flow2.wet.surface	27.77	0.367	0.0316	5.9	0	1.391	257.371	1.86088	6863.83	46.2931	372.036	2.48452
338	E7	2018-12-23		5.31967	103.092	0	River estuary	High flow2	wet	mid	High flow2.wet.mid	27.8	0.602	0.0323	5.79	0	1.555	243.866	1.67254	6506.42	41.6148
339	E7	2018-12-23		5.31967	103.092	0	River estuary	High flow2	wet	bottom	High flow2.wet.bottom	27.79	1.197	0.0319	5.75	0	1.932	250.188	1.59901	6672.26	39.7787
340	E8	2018-12-23		5.32439	103.1	0	River estuary	High flow2	wet	surface	High flow2.wet.surface	27.73	0.316	0.01	5.92	0	1.402	235.757	1.85235	6287.41	46.0812	338.831	2.47206
341	E8	2018-12-23		5.32439	103.1	0	River estuary	High flow2	wet	mid	High flow2.wet.mid	27.8	0.71	0.01	5.75	0	1.604	236.294	1.72418	6304.39	42.8998
342	E8	2018-12-23		5.32439	103.1	0	River estuary	High flow2	wet	bottom	High flow2.wet.bottom	27.81	1.539	0.01	5.66	0	1.809	260.348	1.94832	6949.09	48.4849
343	E9	2018-12-23		5.32511	103.108	0	River estuary	High flow2	wet	surface	High flow2.wet.surface	27.64	0.5	0.0354	5.9	0	1.741	261.331	2.38549	6925.35	59.1944	375.646	3.20441
344	E9	2018-12-23		5.32511	103.108	0	River estuary	High flow2	wet	mid	High flow2.wet.mid	27.57	3.212	0.0357	5.76	0	2.075	307.287	2.57257	8119.13	63.7615
345	E9	2018-12-23		5.32511	103.108	0	River estuary	High flow2	wet	bottom	High flow2.wet.bottom	27.55	4.166	0.0369	5.43	0	2.021	268.064	2.2611	7076.78	56.0229
346	E10	2018-12-23		5.32416	103.117	0	River estuary	High flow2	wet	surface	High flow2.wet.surface	27.83	0.325	0.0488	5.9	0	2.147	269.335	2.62996	7195.05	65.4696	391.087	3.56174
347	E10	2018-12-23		5.32416	103.117	0	River estuary	High flow2	wet	mid	High flow2.wet.mid	27.88	0.69	0.0474	5.89	0	1.873	267.612	2.44705	7164.18	60.9673
348	E10	2018-12-23		5.32416	103.117	0	River estuary	High flow2	wet	bottom	High flow2.wet.bottom	27.89	1.245	0.0455	5.95	0	1.735	271.199	2.23354	7263.26	55.657
349	E11	2018-12-23		5.32429	103.126	0	River estuary	High flow2	wet	surface	High flow2.wet.surface	27.96	0.317	0.0653	6.13	0	1.766	240.916	2.28565	6471.35	57.0222	349.27	3.09108
350	E11	2018-12-23		5.32429	103.126	0	River estuary	High flow2	wet	mid	High flow2.wet.mid	27.96	0.565	0.0641	6.13	0	2.753	259.418	2.50639	6968.35	62.5292
351	E11	2018-12-23		5.32429	103.126	0	River estuary	High flow2	wet	bottom	High flow2.wet.bottom	27.96	0.862	0.0661	6.01	0	2.198	251.595	2.20476	6761.07	55.0134
352	E12	2018-12-23		5.33121	103.13	0	River estuary	High flow2	wet	surface	High flow2.wet.surface	28.19	0.581	0.2608	6.43	0	2.415	241.617	2.23752	6553.66	56.0349	353.661	3.03871
353	E12	2018-12-23		5.33121	103.13	0	River estuary	High flow2	wet	mid	High flow2.wet.mid	28.17	1.05	0.2584	6.42	0	2.483	225.497	2.32234	6111.24	58.1397
354	E12	2018-12-23		5.33121	103.13	0	River estuary	High flow2	wet	bottom	High flow2.wet.bottom	28.07	2.107	0.2951	6.4	0	2.416	202.715	2.30582	5470.65	57.6301
355	E13	2018-12-23		5.33909	103.133	0	River estuary	High flow2	wet	surface	High flow2.wet.surface	28.17	0.43	0.2122	6.63	0	1.923	196.388	2.20402	5322.35	55.1778	282.784	2.9908
356	E13	2018-12-23		5.33909	103.133	0	River estuary	High flow2	wet	mid	High flow2.wet.mid	28.08	2.409	0.2753	6.39	0	1.927	195.838	2.23247	5287.3	55.8062
357	E13	2018-12-23		5.33909	103.133	0	River estuary	High flow2	wet	bottom	High flow2.wet.bottom	28.07	4.807	0.601	6.41	0	1.938	197.185	3.38336	5321.43	84.5596
358	E14	2018-12-23		5.33975	103.142	0	River estuary	High flow2	wet	surface	High flow2.wet.surface	28.28	0.4	0.3323	6.73	0	1.936	190.54	2.55358	5187.95	64.0452	274.885	3.49076
359	E14	2018-12-23		5.33975	103.142	0	River estuary	High flow2	wet	mid	High flow2.wet.mid	28.03	5.063	2.845	6.44	0	2.153	178.959	3.81456	4821.59	95.2575
360	E14	2018-12-23		5.33975	103.142	0	River estuary	High flow2	wet	bottom	High flow2.wet.bottom	28.98	9.699	32.726	8.36	0	2.802	25.047	1.14863	702.862	29.0492
361	E15	2018-12-23		5.3434	103.149	0	River estuary	High flow2	wet	surface	High flow2.wet.surface	28.23	0.527	1.8	8.26	0	2.033	104.449	2.60901	2837.98	65.3738	131.209	3.35759
362	E15	2018-12-23		5.3434	103.149	0	River estuary	High flow2	wet	mid	High flow2.wet.mid	27.88	3.402	2.039	7.51	0	2.265	187.709	6.60576	5025.28	164.558
363	E15	2018-12-23		5.3434	103.149	0	River estuary	High flow2	wet	bottom	High flow2.wet.bottom	29.02	6.165	46.645	8.19	0	2.62	18.4314	0.28226	518.216	7.13299
364	ES1	2019-03-31	08:55:00	5.33557	103.13	0	River estuary	Low tide	Neap tide	Surface	Neap tide.Surface	29.01	1.009	3.52	88.1	6.21	2.096	106.167	1.89046	2981.49	49.5143	49.7375	0.905388
365	ES1	2019-03-31	09:18:00	5.33557	103.13	0	River estuary	Low tide	Neap tide	Surface	Neap tide.Surface	29.06	0.754	3.52	93.8	6.99	0	71.0244	2.21225	1998.81	57.9893	30.6949	1.06747
366	ES1	2019-03-31	09:45:00	5.33557	103.13	0	River estuary	Low tide	Neap tide	Surface	Neap tide.Surface	29.12	0.251	3.52	92	6.89	2.102	66.1024	2.32404	1865.02	60.9787	28.1038	1.12521
367	ES1	2019-03-31	10:03:00	5.33557	103.13	0	River estuary	Low tide	Neap tide	Surface	Neap tide.Surface	29.2	0.1	3.34	73	0	0	59.5427	0.414804	1685.63	10.898	24.6482	0.170095
368	ES1	2019-03-31	11:03:00	5.33557	103.13	0	River estuary	Low tide	Neap tide	Surface	Neap tide.Surface	29.48	0.162	0	81	6.05	6.991	75.5236	2.08782	2144.37	54.9177	34.0401	1.03529
369	ES1	2019-03-31	12:02:00	5.33557	103.13	0	River estuary	Low tide	Neap tide	Surface	Neap tide.Surface	29.46	0.747	3.12	81.5	5.94	8.571	72.9813	2.42833	2088.91	64.0674	32.515	1.19165
370	ES1	2019-03-31	13:12:00	5.33557	103.13	0	River estuary	Low tide	Neap tide	Surface	Neap tide.Surface	29.79	0.954	4.08	82.6	6.07	7.777	109.195	2.49081	3169.44	66.0537	53.3283	1.22777
371	ES1	2019-03-31	14:12:00	5.33557	103.13	0	River estuary	Low tide	Neap tide	Surface	Neap tide.Surface	30.19	0.567	5.22	85.8	6.12	8.351	94.1398	2.64159	2779.13	70.4838	45.614	1.31077
372	ES1	2019-03-31	15:18:00	5.33557	103.13	0	River estuary	Low tide	Neap tide	Surface	Neap tide.Surface	30.34	1.062	7.75	89.5	5.81	8.099	57.4909	2.09951	1708.08	56.1299	24.7015	1.02275
373	ES1	2019-03-31	16:10:00	5.33557	103.13	0	River estuary	Low tide	Neap tide	Surface	Neap tide.Surface	30.91	0.528	14.17	92.5	6.26	8.603	31.9976	0.553577	973.973	14.9148	10.4287	0.236951
374	ES1	2019-03-31	17:14:00	5.33557	103.13	0	River estuary	Low tide	Neap tide	Surface	Neap tide.Surface	30.65	0.883	19.08	97.1	6.35	8.764	26.3506	1.13943	793.381	30.5544	6.90487	0.506782
375	ES1	2019-03-31	18:14:00	5.33557	103.13	0	River estuary	Low tide	Neap tide	Surface	Neap tide.Surface	30.57	0.589	18.73	93.9	6.13	9.291	23.6706	1.27393	710.278	34.1214	5.39369	0.570572
376	ES1	2019-03-31	18:42:00	5.33557	103.13	0	River estuary	Low tide	Neap tide	Surface	Neap tide.Surface	30.44	0.892	16.78	95.6	6.16	8.189	30.2736	1.2251	903.4	32.7585	8.98792	0.55164
377	ES1	2019-03-31	19:14:00	5.33557	103.13	0	River estuary	Low tide	Neap tide	Surface	Neap tide.Surface	30.39	0.903	17.68	96.3	6.15	8.128	25.514	1.30056	759.77	34.745	6.3192	0.583707
378	ES1	2019-03-31	19:42:00	5.33557	103.13	0	River estuary	High tide	Neap tide	Surface	Neap tide.Surface	30.35	0.709	23.4	98	6.22	3.916	19.8929	0.843586	591.439	22.5037	3.15666	0.353087
379	ES1	2019-03-31	20:11:00	5.33557	103.13	0	River estuary	High tide	Neap tide	Surface	Neap tide.Surface	30.11	0.673	23.22	95.7	6.11	10.533	21.0713	0.809453	620.146	21.5151	3.66864	0.335263
380	ES1	2019-03-31	21:16:00	5.33557	103.13	0	River estuary	Low tide	Neap tide	Surface	Neap tide.Surface	30.16	0.799	16.72	93.5	6.39	7.511	22.3199	1.13405	658.21	30.1943	4.47076	0.503792
381	ES1	2019-03-31	22:16:00	5.33557	103.13	0	River estuary	Low tide	Neap tide	Surface	Neap tide.Surface	30.25	0.593	15.01	89.5	6.2	6.86788	34.4821	1.34756	1020.72	35.9378	11.2193	0.613391
382	ES1	2019-03-31	23:06:00	5.33557	103.13	0	River estuary	Low tide	Neap tide	Surface	Neap tide.Surface	30.5	0.1	13.16	82.3	0	2.53288	41.2221	1.27118	1233.16	34.0408	15.2912	0.587635
383	ES1	2019-04-01	00:15:00	5.33557	103.13	0	River estuary	Low tide	Neap tide	Surface	Neap tide.Surface	30.18	0.783	10.87	87.2	6.18	7.59588	45.3785	1.71576	1339.2	45.7357	17.413	0.809355
384	ES1	2019-04-01	01:03:00	5.33557	103.13	0	River estuary	Low tide	Neap tide	Surface	Neap tide.Surface	30.08	0.669	8.67	87.1	6.25	8.07987	52.2921	1.61744	1536.66	43.0613	21.321	0.768801
385	ES1	2019-04-01	02:16:00	5.33557	103.13	0	River estuary	Low tide	Neap tide	Surface	Neap tide.Surface	29.96	0.521	7.64	87.1	6.31	8.35787	68.342	0.938599	1998.09	24.9452	30.2097	0.43155
386	ES1	2019-04-01	03:23:00	5.33557	103.13	0	River estuary	Low tide	Neap tide	Surface	Neap tide.Surface	29.84	0.694	6.14	86.1	6.3	8.29287	88.3651	1.13603	2570.36	30.1416	41.3747	0.533185
387	ES1	2019-04-01	04:15:00	5.33557	103.13	0	River estuary	Low tide	Neap tide	Surface	Neap tide.Surface	29.67	0.539	5.31	86.8	6.41	6.84888	106.021	2.23207	3061.78	59.0701	50.9622	1.08428
388	ES2	2019-08-04	10:06:47	5.33945	103.131	0	River estuary	High tide	Spring tide	Surface	Spring tide.Surface	28.52	0.069	29.3	100.4	6.1		24.6242	0.177922	677.643	4.46902	9.51981	0.0837977
389	ES2	2019-08-04	12:58:00	5.33945	103.131	0	River estuary	High tide	Spring tide	Surface	Spring tide.Surface	30.31	0.307	31.68	95.8	5.65		23.7796	-0.0200137	705.902	NA	10.4984	-0.0861311
390	ES2	2019-08-04	14:09:30	5.33945	103.131	0	River estuary	Low tide	Spring tide	Surface	Spring tide.Surface	31.38	0.475	19.71	94.6	6.13		23.5315	0.255394	730.727	6.70914	12.0684	0.17606
391	ES2	2019-08-04	16:06:20	5.33945	103.131	0	River estuary	Low tide	Spring tide	Surface	Spring tide.Surface	30.81	0.564	17.9	93.9	6.15		25.7488	0.499896	780.51	13.0241	14.0156	0.4126
392	ES2	2019-08-04	18:14:00	5.33945	103.131	0	River estuary	Low tide	Spring tide	Surface	Spring tide.Surface	30.51	0.851	9.73	92.3	6.56		46.6693	0.73527	1396.63	19.0908	38.8784	0.668307
393	ES2	2019-08-04	20:11:30	5.33945	103.131	0	River estuary	Low tide	Spring tide	Surface	Spring tide.Surface	30.05	0.584	5.12	81.8	6.01		68.5762	0.617441	2012.5	15.9267	64.377	0.556061
394	ES2	2019-08-04	22:09:00	5.33945	103.131	0	River estuary	Low tide	Spring tide	Surface	Spring tide.Surface	29.81	0.484	3.88	87.6	6.52		81.5549	0.639066	2369.16	16.4246	79.1013	0.578379
395	ES2	2019-08-05	00:08:30	5.33945	103.131	0	River estuary	Low tide	Spring tide	Surface	Spring tide.Surface	29.57	0.647	3.39	88.5	6.63		82.84	0.880211	2382.16	22.5374	79.7445	0.823412
396	ES2	2019-08-05	02:07:10	5.33945	103.131	0	River estuary	Low tide	Spring tide	Surface	Spring tide.Surface	29.48	0.339	2.17	88.2	6.64		98.0153	0.862745	2807.78	22.0615	97.482	0.809314
397	ES2	2019-08-05	04:06:10	5.33945	103.131	0	River estuary	Low tide	Spring tide	Surface	Spring tide.Surface	29.46	0.649	2.79	85.7	6.49		86.8246	1.03383	2485.13	26.4261	84.113	0.981523
398	ES2	2019-08-05	06:08:00	5.33945	103.131	0	River estuary	Low tide	Spring tide	Surface	Spring tide.Surface	29.6	0.725	1.19	85.1	6.43		125.952	1.35792	3626.37	34.7944	131.407	1.33266
399	ES2	2019-08-05	08:07:40	5.33945	103.131	0	River estuary	Low tide	Spring tide	Surface	Spring tide.Surface	29.55	0.423	1.07	87.9	6.66		116.73	1.17542	3353.74	30.0945	120.3	1.14179
400	ES2	2019-08-05	10:07:10	5.33945	103.131	0	River estuary	Low tide	Spring tide	Surface	Spring tide.Surface	29.93	0.37	17.89	97.9	6.68		25.4231	0.546412	742.479	14.0459	12.5009	0.445088
401	ES2	2019-08-05	12:05:50	5.33945	103.131	0	River estuary	High tide	Spring tide	Surface	Spring tide.Surface	30.22	0.446	30.42	96.1	6.01		24.1311	0.105802	713.597	2.72745	10.8278	0.0250517
