# Supplementary material for: An assessment of CO2 and CH4 emissions in a tropical river: from the Kenyir Reservoir to the estuary
Source: PeerJ. 2025 Sep 3;13:e19929. doi: 10.7717/peerj.19929 (PMC12422260; doi:10.7717/peerj.19929)
Supplement: Supplemental Information 3 [file peerj-13-19929-s003.docx]

|  |
| --- |
| | Gas | A | B | C | D | | --- | --- | --- | --- | --- | | Seawater | | | | | | CO2 | 2073.1 | 125.62 | 3.6276 | 0.043219 | | CH4 | 2039.2 | 120.31 | 3.4209 | 0.040437 | | Fresh Water | | | | | | CO2 | 1911.1 | 118.11 | 3.4527 | 0.04132 | | CH4 | 1897.8 | 114.28 | 3.2902 | 0.039061 | |
